# Supplementary material for: Factors associated with children and young people’s mental health in the English-speaking Caribbean region: Systematic review and narrative synthesis
Source: PubMed Central journal article supplement (PMC9994705; doi:10.1371/journal.pone.0282666), 2023-03-08
Supplement: pone.0282666.s002.pdf [file pone.0282666.s002.pdf]

**Supplementary Information 2. Characteristics of the reviewed studies (K=83)**

| Reference: First author, year of publication | Country             | Presenting problem explored                                                      | Outcome measures                                                                                                                                                                                            | Study design | Sample size | MeanAge (SD) or age range in years | Predominant sex (%)                  | Primary recruitment setting |
|----------------------------------------------|---------------------|----------------------------------------------------------------------------------|-------------------------------------------------------------------------------------------------------------------------------------------------------------------------------------------------------------|--------------|-------------|------------------------------------|--------------------------------------|-----------------------------|
| Harrison, 2020                               | Jamaica             | Disordered Eating Behaviours and Attitudes                                       | Eating Attitude Test (EAT); Rosenberg Self- Esteem (RSE) scale                                                                                                                                              | Quantitative | 521         | 14.8 (not specified)               | 56.05% females                       | Education                   |
| Chung, 2020                                  | Jamaica             | Depressive symptoms                                                              | The Adolescent Depression Rating Scale (ADRS)                                                                                                                                                               | Quantitative | 321         | 10 to 12                           | 49.8% females (7.8% did not respond) | Education                   |
| Johnson, 2019                                | Guyana              | Suicidality                                                                      | Not applicable                                                                                                                                                                                              | Qualitative  | 13          | Adolescents                        | 55.41% females                       | Community                   |
| Gardner, 2019                                | Jamaica             | Multiple: self-esteem, psychological well-being, stress, anxiety, and depression | Depression, Anxiety, and Stress Scale–Short Form (DASS- 21); Psychological Well-being Scale–Short Version (PWB-18); Multidimensional Scale of Perceived Social Support; Rosenberg’s Self-Esteem (RSE) Scale | Quantitative | 334         | 14.56 (1.94)                       | 51% males                            | Education                   |
| Baker-Henningham, 2019                       | Jamaica             | Behaviour and conduct problems                                                   | Observations; Emotional Support Domain in the Classroom Assessment Scoring System (CLASS-K- 3)                                                                                                              | Quantitative | 220         | 6 to 7                             | 54% males                            | Education                   |
| Elledge, 2019                                | Jamaica             | Multiple: suicidality, internal distress (worry, loneliness)                     | Jamaica Global School- based Health Survey (GSHS)                                                                                                                                                           | Quantitative | 1623        | 11 to 16                           | 51.2% females                        | Education                   |
| Bateman, 2019                                | Jamaica             | PTSD                                                                             | Impact of Event Scale- Revised (IES-R); General Self-Efficacy Scale (GSES)                                                                                                                                  | Quantitative | 46          | 18 to 24                           | 65.2% males                          | Education                   |
| Gardner, 2019                                | Jamaica             | Depressive symptoms                                                              | Depression, Anxiety and Stress Scale Short (DASS) Form; Rosenberg Self- esteem (RSE) Scale; Schutte Emotional Intelligence Scale                                                                            | Quantitative | 334         | 14.74 (1.95)                       | 51% males                            | Education                   |
| Descartes, 2019                              | Trinidad and Tobago | Behaviour and conduct problems                                                   | Direct and Indirect Aggression Scale (DIAS); Culture Free Self-Esteem Inventories (CFSEI-3)                                                                                                                 | Quantitative | 170         | 9 to 15                            | 52% females                          | Education                   |
| Oshi, 2018                                   | Barbados            | Behaviour and conduct problems                                                   | National Secondary Schools Survey                                                                                                                                                                           | Quantitative | 8109        | 14 (not specified)                 | 59% females                          | Education                   |
| Debowska, 2018                               | Barbados & Grenada  | Behaviour and conduct problems                                                   | Author developed/adapted questionnaire                                                                                                                                                                      | Quantitative | 1351        | 9 to 17                            | 50.1% females                        | Education                   |
| Giray, 2018                                  | Jamaica             | Depressive symptoms                                                              | Jamaican Youth Risk and Resiliency Behaviour Survey, Patient Health Questionnaire (Adapted)                                                                                                                 | Quantitative | 366         | 13.8 (not specified)               | 64% females                          | Education                   |
| Heron, 2017                                  | Jamaica             | Suicidality                                                                      | Suicidal Behaviours Questionnaire- Revised (SBQ_R)                                                                                                                                                          | Quantitative | 3471        | 10 to 19                           | 58.8% females                        | Education                   |
| Kwangu, 2017                                 | Bahamas             | Suicidality                                                                      | Global School- based student Health Survey (GSHS)                                                                                                                                                           | Quantitative | 1357        | 13 to 17                           | 53.1% females                        | Education                   |

|                      |                                                                      |                                                   |                                                                                                                                                                                 |               |      |                       |                |            |
|----------------------|----------------------------------------------------------------------|---------------------------------------------------|---------------------------------------------------------------------------------------------------------------------------------------------------------------------------------|---------------|------|-----------------------|----------------|------------|
| Siziya, 2017         | Guyana                                                               | Suicidality                                       | Global School-based Health Survey (GSHS)                                                                                                                                        | Quantitative  | 2392 | Mode 14 to 15         | 51.5% female   | Education  |
| Siziya, 2017         | Jamaica                                                              | Suicidality                                       | Jamaica Global School- based Health Survey (GSHS)                                                                                                                               | Quantitative  | 1623 | Grade 7 to 12         | 51.4% males    | Education  |
| Denton, 2017         | Guyana                                                               | Suicidality                                       | DSM-5 Level 1 Cross- Cutting Symptom Measure; Behavioural Assessment Schedule for Children, 2nd Edition (BASC-2)                                                                | Mixed Methods | 25   | 12.7 (not specified)  | 52% females    | Healthcare |
| Graham, 2016         | Jamaica                                                              | Stress                                            | Author developed/adapted questionnaire                                                                                                                                          | Quantitative  | 106  | 23.16 (9.0)           | 97.2% females  | Education  |
| Youssef, 2016        | Trinidad and Tobago                                                  | Multiple: depressive symptoms and stress          | Maslach Burnout Inventory (MBI); Perceived Medical School Stress scale (PMSS); Patient Health Questionnaire (PHQ-9)                                                             | Quantitative  | 381  | 22.4 (3)              | 67% females    | Education  |
| Maguire, 2016        | Trinidad and Tobago                                                  | Behaviour and conduct problems                    | Trinidad & Tobago Youth Survey (TTYS)                                                                                                                                           | Quantitative  | 2552 | 15.4 (not specified)  | 60% females    | Education  |
| Harrison, 2015       | Jamaica                                                              | Disordered Eating Behaviours and Attitudes        | Rosenberg Self-Esteem (RSE) scale; EAT-26 scale; Parent and Peer Attachment Scales.                                                                                             | Quantitative  | 524  | 14.9 (not specified)  | 56% females    | Education  |
| Toussaint, 2015      | Trinidad and Tobago                                                  | Suicidality                                       | Trend Research Empowering National Development (TREND)                                                                                                                          | Quantitative  | 4448 | 18.14 (1.16)          | 57% females    | Community  |
| Lowe, 2014           | Jamaica, Bahamas, St. Vincent and the Grenadines & St. Kitts & Nevis | Depressive symptoms                               | Beck Depression Inventory (BDI-II)                                                                                                                                              | Quantitative  | 1955 | 15.3 (0.95)           | 52.1% females  | Education  |
| Wilson-Mitchel, 2014 | Jamaica                                                              | Multiple: psychological distress or suicidality   | Not applicable                                                                                                                                                                  | Mixed Methods | 30   | 15.6 (0.93)           | 100% females   | Healthcare |
| McFarlane, 2014      | Jamaica                                                              | Depressive symptoms                               | Jamaica Youth Risk and Resiliency Behaviour Survey; The Ministry of Health screening tool (adaptation of the Diagnostic and Statistical Manual of Mental Disorders 4th Edition) | Quantitative  | 1312 | 15 to 19              | 54.57% females | Community  |
| Maguire, 2013        | Trinidad and Tobago                                                  | Behaviour and conduct problems                    | Trinidad and Tobago Youth Survey (TTYS)                                                                                                                                         | Quantitative  | 2552 | 15.4 (not specified)  | 60% females    | Education  |
| Smith, 2013          | Jamaica                                                              | Multiple: psychological and behavioural wellbeing | Massachusetts Youth Screening Instrument: Version 2 (MAYSI-2)                                                                                                                   | Quantitative  | 563  | 15.10 (not specified) | 57.2% females  | Education  |
| Guzder, 2013         | Jamaica                                                              | Behaviour and conduct problems                    | Achenbach System of Empirically Based Assessment (ASEBA) Teacher Report Form                                                                                                    | Quantitative  | 30   | 9.1 (0.41)            | 57% males      | Education  |

|                        |                                                                                  |                                           |                                                                                                                 |              |      |                                  |                 |                  |
|------------------------|----------------------------------------------------------------------------------|-------------------------------------------|-----------------------------------------------------------------------------------------------------------------|--------------|------|----------------------------------|-----------------|------------------|
| Smith, 2013            | Jamaica                                                                          | Multiple                                  | Massachusetts Youth Screening Instrument Version 2 (MAYSI-2); Author-developed behaviour problem questionnaire. | Quantitative | 171  | 15.14 (1.40)                     | 54.2% males     | Education        |
| Baker-Henningham, 2012 | Jamaica                                                                          | Behaviour and conduct problems            | Not applicable                                                                                                  | Quantitative | 225  | 3 to 6                           | 61% males       | Education        |
| Lipps, 2012            | Jamaica, Bahamas, St. Vincent and the Grenadines & St. Kitts and Nevis           | Depressive symptoms                       | Parenting Practices Scales (PPS); Beck Depression Inventory - II (BDI-II)                                       | Quantitative | 1955 | 15.3 (0.95)                      | 52.1% females   | Education        |
| Abdirahman, 2012       | Cayman Islands, St Lucia, St Vincent and the Grenadines, and Trinidad and Tobago | Multiple: depression, anxiety, loneliness | Global School-based Student Health Survey (GSHS)                                                                | Quantitative | 6780 | 13 to 15                         | 52.98% females  | Education        |
| Abel, 2012             | Jamaica                                                                          | Depressive symptoms                       | Caribbean Adolescent Health Survey (PAHO); Global School Health Survey (WHO),                                   | Quantitative | 3003 | 12.45 (1.68)                     | 52.65 % females | Education        |
| Holder-Nevis, 2012     | Jamaica                                                                          | Suicidality                               | Case notes                                                                                                      | Quantitative | 26   | 16 (3.01)                        | 76.9% males     | Community Police |
| Williams-Johnson, 2012 | Jamaica                                                                          | Suicidality                               | Author developed/adapted questionnaire                                                                          | Quantitative | 127  | Mode 16 to 20 and 56.7% under 25 | 75.6% females   | Healthcare       |
| Abell, 2012            | Jamaica                                                                          | Suicidality                               | Global School Health Survey (WHO)                                                                               | Quantitative | 2997 | 10 to 15                         | 52.69% females  | Education        |
| Maguire, 2011          | Trinidad and Tobago                                                              | Behaviour and conduct problems            | Trinidad and Tobago Youth Survey (TTYS)                                                                         | Quantitative | 2552 | 15.4 (not specified)             | 60% females     | Education        |
| Smith, 2011            | Jamaica                                                                          | Multiple                                  | Massachusetts Youth Screening Instrument-2 (MAYSI-2); Rosenberg Self-esteem Scale                               | Quantitative | 563  | 15.08 (not specified)            | 57.2% females   | Education        |
| Lipps, 2010            | Jamaica                                                                          | Depressive symptoms                       | Beck Depression Inventory-II (BDI-II)                                                                           | Quantitative | 278  | 15.0 (0.6)                       | 52% females     | Education        |
| Galler, 2010           | Barbados                                                                         | Depressive symptoms                       | Minnesota General Adjustment and Morale Scale                                                                   | Quantitative | 177  | 11 to 17                         | Unclear         | Education        |
| Alleyne, 2010          | Barbados                                                                         | Multiple: stress and life satisfaction    | Satisfaction with Life Scale (SLS); Perceived Stress Scale (PSS)                                                | Quantitative | 172  | 24.9 (not specified)             | 70% females     | Education        |

|                        |                                                               |                                         |                                                                                                                                                                                            |              |      |                    |               |           |
|------------------------|---------------------------------------------------------------|-----------------------------------------|--------------------------------------------------------------------------------------------------------------------------------------------------------------------------------------------|--------------|------|--------------------|---------------|-----------|
| Kukoyi, 2010           | Jamaica                                                       | Suicidality                             | 9-country Caribbean survey (Adapted)                                                                                                                                                       | Quantitative | 342  | 10 to 19           | 52.2% females | Education |
| Lipps, 2010            | Jamaica, St. Vincent and the Grenadines & St. Kitts and Nevis | Depressive symptoms                     | Beck Depression Inventory II (BDI-II)                                                                                                                                                      | Quantitative | 1738 | 12 to 19           | 52% females   | Education |
| Maynard, 2009          | Barbados                                                      | Behaviour and conduct problems          | Not applicable                                                                                                                                                                             | Qualitative  | 20   | 14 to 16           | 50% males     | Education |
| Lowe, 2009             | St. Kitts & Nevis                                             | Depressive symptoms                     | Beck Depression Inventory- II (BDI-II)                                                                                                                                                     | Quantitative | 744  | 15.5 (0.8)         | 50.4% females | Education |
| Lowe, 2009             | Jamaica                                                       | Depressive symptoms                     | Brief Screen for Depression (BSD: 16)                                                                                                                                                      | Quantitative | 690  | 23.4 (7.4)         | 77% females   | Education |
| Baker-Henningham, 2009 | Jamaica                                                       | Behaviour and conduct problems          | Strengths and Difficulties Questionnaire (SDQ)                                                                                                                                             | Quantitative | 135  | Pre-schoolers      | 65.19% males  | Education |
| Nichols, 2009          | Barbados, Jamaica, Trinidad and Tobago                        | Multiple: disordered eating, depression | Eating Attitudes Test (EAT-26); Body Shape Questionnaire (BSQ-16); Body Silhouette Chart; Rosenberg Self-Esteem Scale (RSE); Centre for Epidemiologic Studies depression scale (CES-D)     | Quantitative | 383  | 21 (2.8)           | 51.96 males   | Education |
| Maharaj, 2008          | Trinidad and Tobago                                           | Depressive symptoms                     | Beck Depression Inventory (BDI-II)                                                                                                                                                         | Quantitative | 1290 | 13 to 19           | 58.2% females | Education |
| Turton, 2007           | Bermuda                                                       | Behaviour and conduct problems          | Not applicable                                                                                                                                                                             | Qualitative  | 1    | 16-year-old        | 100% females  | Education |
| Rudatsikira, 2007      | Guyana                                                        | Suicidality                             | Guyana Global School- Based HealthSurvey (GSHS)                                                                                                                                            | Quantitative | 1197 | 14 (not specified) | 51% females   | Education |
| Ekundayo, 2007         | Jamaica                                                       | Depressive symptoms                     | Beck's Depression inventory II (BDI-II)                                                                                                                                                    | Quantitative | 748  | 14 to 19           | 64.7% females | Education |
| Meeks Gardner, 2007    | Jamaica                                                       | Behaviour and conduct problems          | Author developed/adapted questionnaire                                                                                                                                                     | Quantitative | 202  | 11.6 (0.6)         | 100% males    | Education |
| Lipps, 2007            | Jamaica                                                       | Depressive symptoms                     | Beck Depression Inventory-II (BDI-II); Centre for Epidemiology Studies-Depression (CES- D); Brief Screen for Depression (BSD); University of Los Angeles Loneliness Scale-Revised (UCLA-R) | Quantitative | 690  | 23.4 (7.4)         | 77% females   | Education |
| Maharajh, 2006         | Trinidad and Tobago                                           | Depressive symptoms                     | Reynolds Adolescent Depression Scale (RADS)                                                                                                                                                | Quantitative | 1845 | 16.3 (1.13)        | 60% females   | Education |

|                 |                                                                       |                                            |                                                                                                                                                                                                                                       |              |       |                      |                |            |
|-----------------|-----------------------------------------------------------------------|--------------------------------------------|---------------------------------------------------------------------------------------------------------------------------------------------------------------------------------------------------------------------------------------|--------------|-------|----------------------|----------------|------------|
| Steely, 2006    | Jamaica                                                               | Multiple: psychological adjustment         | Family History Assessment Form; Physical Punishment Questionnaire: Youth Form (Youth PPQ); Parental Acceptance- Rejection Questionnaire/Short Form (PARQ/Short Form); Personality Assessment Questionnaire: Child Version (Child PAQ) | Quantitative | 97    | 7 to 18              | 55% females    | Healthcare |
| Ramberan, 2006  | Trinidad and Tobago                                                   | Disordered Eating Behaviours and Attitudes | Eating Attitudes Test (EATS-26); Body Shape Questionnaire (BSQ-16); Body Silhouette Chart; Rosenberg Self-Esteem Scale (RSE); Drive for thinness subscale of the Eating Disorder Inventory 2.                                         | Quantitative | 251   | 16.3 (1.37)          | 100% females   | Education  |
| Lipps, 2006     | Jamaica                                                               | Depressive symptoms                        | Brief Screen for Depression (BSD); Beck Depression Inventory (BDI-II); Centre for Epidemiology Studies- Depression (CES-D); University of Los Angeles Loneliness Scale-Revised (UCLA-R)                                               | Quantitative | 244   | 22.7 (not specified) | 81.97% females | Education  |
| Marlowe, 2005   | Bermuda                                                               | Disordered Eating Behaviours and Attitudes | Bulimic Investigatory Test, Edinburgh (BITE); Eating Attitudes Test (EAT-40)                                                                                                                                                          | Quantitative | 836   | 12.2 (0.66)          | 52.5% females  | Education  |
| Maharajh, 2005  | Trinidad and Tobago                                                   | Suicidality                                | Community Assessment of Psychic Experiences (CAPE) questionnaire                                                                                                                                                                      | Quantitative | 227   | 12 to 20             | Unclear        | Education  |
| Pottinger, 2005 | Jamaica                                                               | Loss and grief                             | Author developed/adapted questionnaire                                                                                                                                                                                                | Quantitative | 54    | 9 to 10              | 52% males      | Education  |
| Maharajh, 2005  | Trinidad and Tobago                                                   | Multiple                                   | Case notes (DSM criteria)                                                                                                                                                                                                             | Quantitative | 349   | 14.4(2.85)           | 60% males      | Healthcare |
| Ali, 2005       | Trinidad and Tobago                                                   | Suicidality                                | The Suicidal Ideation Questionnaire (SIQ)                                                                                                                                                                                             | Quantitative | 1845  | 14 to 20             | 60% females    | Education  |
| Maharajh, 2004  | Trinidad and Tobago                                                   | Depressive symptoms                        | Reynolds Adolescent Depression Scale (RADS); Patient Health Questionnaires (PHQ-9)                                                                                                                                                    | Quantitative | 198   | 16.3 (not specified) | 60% females    | Education  |
| Halcón, 2003    | Antigua, Barbados, Bahamas, BVI, Dominica, Grenada, Guyana, St. Lucia | Multiple                                   | Author developed/adapted questionnaire                                                                                                                                                                                                | Quantitative | 15695 | 10 to 18             | 61% females    | Education  |

|                       |                                |                                              |                                                                                                                     |               |     |                       |                |                      |
|-----------------------|--------------------------------|----------------------------------------------|---------------------------------------------------------------------------------------------------------------------|---------------|-----|-----------------------|----------------|----------------------|
| Bhugra, 2003          | Trinidad and Tobago, Barbados  | Disordered Eating Behaviours and Attitudes   | Bulimia Investigatory Test, Edinburgh (BITE); DSM-III-R Bulimia Diagnostic Interview                                | Quantitative  | 362 | 13 to 19              | 100% females   | Education            |
| Pottinger, 2003       | Jamaica                        | Suicidality                                  | Case notes (DSM criteria)                                                                                           | Quantitative  | 57  | 12 (2.61)             | 60% females    | Healthcare           |
| Naidu, 2002           | Trinidad & Tobago              | Stress                                       | Dental Environment Stress (DES)                                                                                     | Quantitative  | 94  | 22 (not specified)    | 55% females    | Education            |
| Baboolal, 2002        | Trinidad and Tobago            | Multiple                                     | Case notes (DSM IV criteria)                                                                                        | Quantitative  | 32  | 24.9 (2.83)           | 50% females    | Education            |
| White, 2002           | Jamaica                        | Disordered Eating Behaviours and Attitudes   | Author developed/adapted questionnaire                                                                              | Quantitative  | 24  | 18.86 (not specified) | 90.91% females | Healthcare           |
| Lambert, 2001         | Jamaica                        | Multiple: behavioural and emotional problems | Child Behaviour Checklist; Jamaican Teacher's Report Form                                                           | Mixed Methods | 78  | 8.7 (1.59)            | Unclear        | Education            |
| Durbrow, 2000         | St. Vincent and the Grenadines | Multiple: anxiety and attention problems     | Middle Childhood-Home Inventory; Learning Behaviours Scale; Revised Behaviour problem Checklist                     | Quantitative  | 61  | 5 to 14               | 69% males      | Education            |
| Foster-Williams, 2000 | Jamaica                        | Psychological distress                       | General Health Questionnaire (GHQ); Chronicity and General Health Questionnaire; Social Adjustment Scale - Modified | Quantitative  | 20  | 16.5 to 18            | 65% females    | Healthcare           |
| Lambert, 1999         | Jamaica                        | Behaviour and conduct problems               | Jamaican Youth Checklist (JYC)                                                                                      | Quantitative  | 864 | 6 to 18               | Unclear        | Education            |
| Perks, 1999           | St. Lucia                      | Depressive symptoms                          | Reynolds Adolescent Depression Scale (RADS); Reynolds Child Depression Scales (RCDS);                               | Quantitative  | 60  | 9 to 17               | 60% females    | Education            |
| Hilton, 1997          | Jamaica                        | Multiple                                     | General health Questionnaire (GHQ); DSM; Modified social adjustment scale; Psychiatric assessment schedule          | Quantitative  | 89  | 18 to 20              | 50.56% females | Healthcare           |
| Deosaran, 1997        | Trinidad and Tobago            | Behaviour and conduct problems               | Author developed/adapted questionnaire                                                                              | Quantitative  | 486 | <18                   | 75.31% males   | Community Group Home |
| Foster-Williams, 1996 | Jamaica                        | Stress                                       | Questionnaire developed by the University of Texas.                                                                 | Quantitative  | 180 | University students   | 50.56% females | Education            |
| Lambert, 1994         | Jamaica                        | Behaviour and conduct problems               | Jamaican Teacher Check List (JTCL)                                                                                  | Quantitative  | 359 | 6 to 11               | 50.7% females  | Education            |
| Richardson, 1989      | Barbados                       | Personality                                  | Personality Priorities Inventory for Adolescents                                                                    | Quantitative  | 194 | 15.6 (0.29)           | 58.76% females | Education            |
| Lambert, 1989         | Jamaica                        | Multiple                                     | Clinician developed questionnaire (DSM- criteria)                                                                   | Quantitative  | 320 | 6 to 17               | 50% females    | Healthcare           |
| Payne, 1988           | Barbados                       | Anxiety/Fear                                 | Author developed/adapted questionnaire                                                                              | Quantitative  | 657 | 12 to 15              | 53.27% females | Education            |
| Burke, 1980           | Jamaica                        | Behaviour and conduct problems               | Not applicable                                                                                                      | Quantitative  | 28  | Mode 16 or 17         | 100% males     | Healthcare           |

|            |         |          |                                   |              |     |        |             |            |
|------------|---------|----------|-----------------------------------|--------------|-----|--------|-------------|------------|
| Wray, 1976 | Jamaica | Multiple | Clinical interview (DSM criteria) | Quantitative | 154 | 10 (3) | 57.7% males | Healthcare |
|------------|---------|----------|-----------------------------------|--------------|-----|--------|-------------|------------|

Note: Table is sorted in descending order according to the year of publication.
